# Supplementary material for: Antioxidant Activity and Spectroscopic Characteristics of Extractable and Non-Extractable Phenolics from Terminalia sericea Burch. ex DC
Source: PubMed Central journal article supplement (PMC6099621; doi:10.3390/molecules23061303), 2018-05-29
Supplement: molecules-23-01303-s001.pdf [file molecules-23-01303-s001.pdf]

SUPPLEMENTARY FIGURE

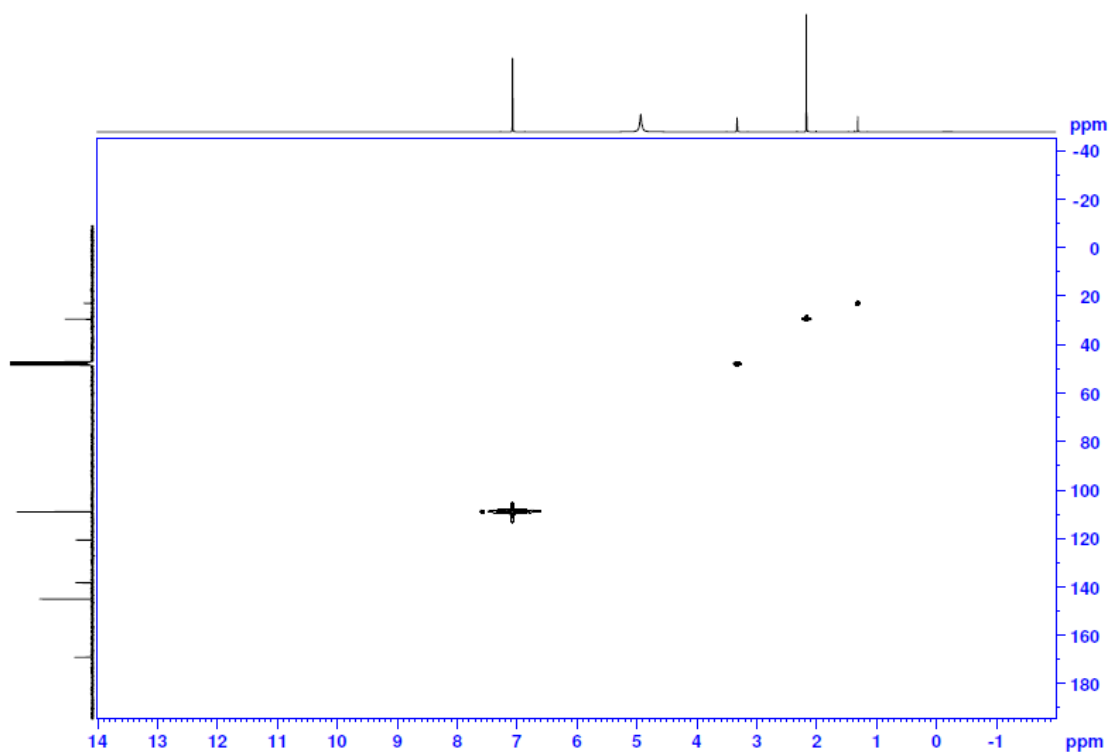

Supplementary Figure 1: HSQC spectrum of gallic acid standard

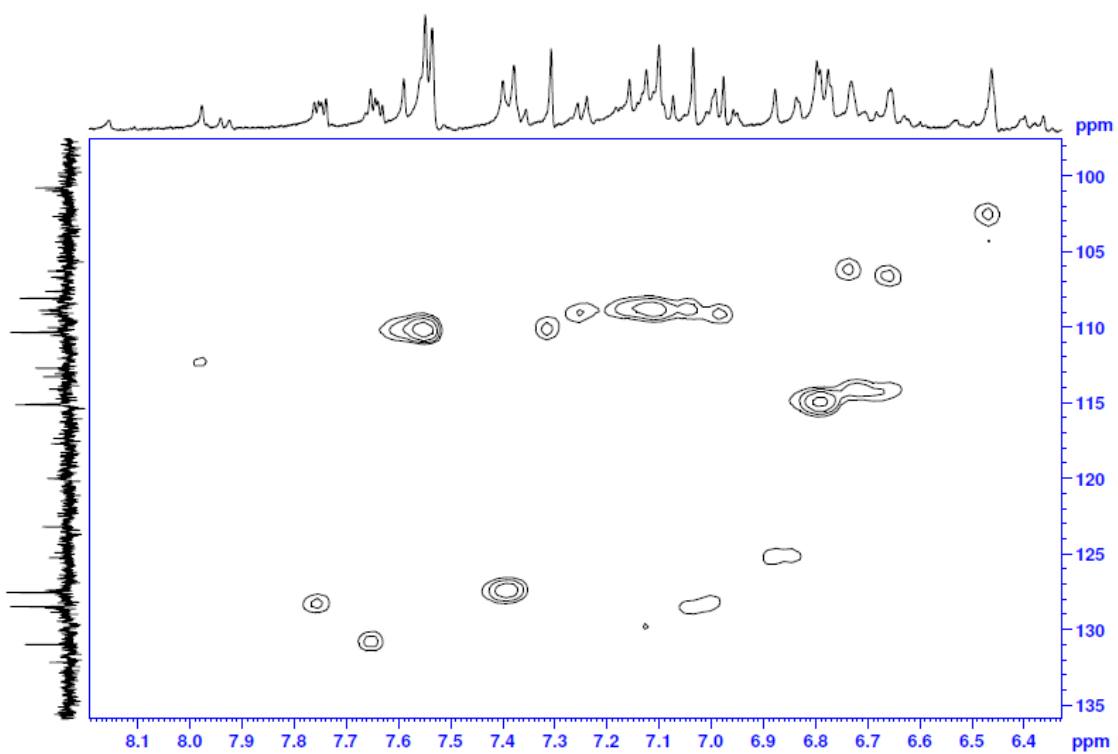

Supplementary Figure 2: HSQC spectrum of RFP A

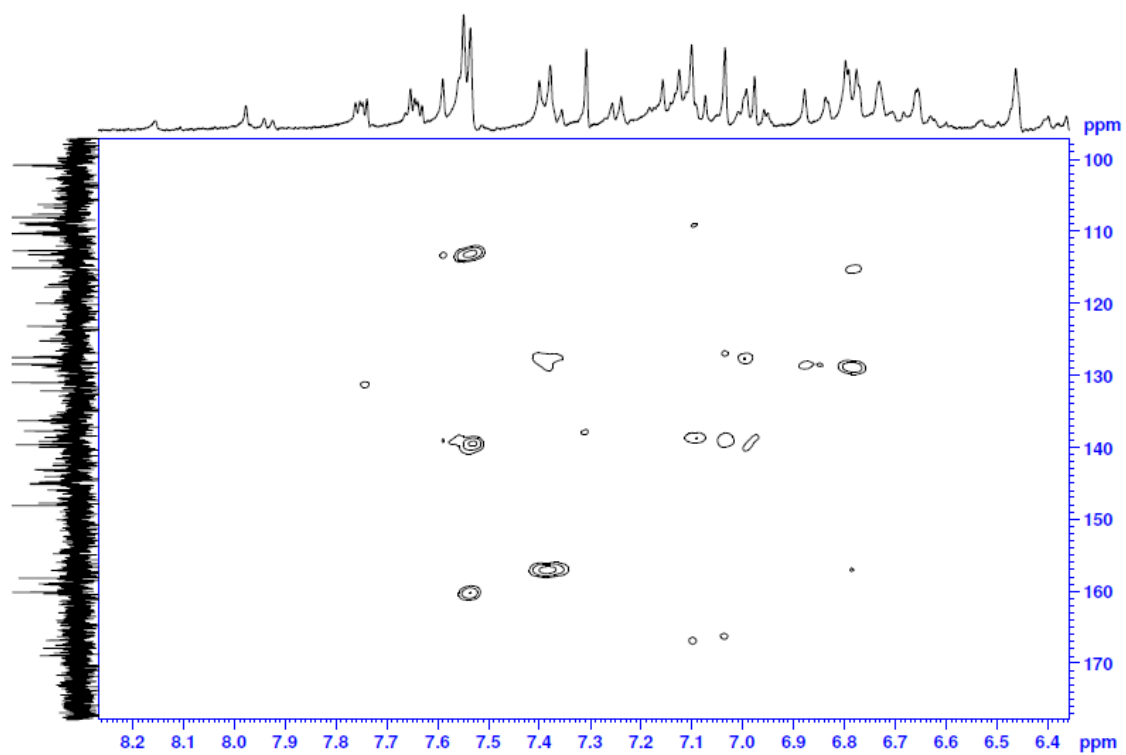

Supplementary Figure 3: HMBC spectrum of RFPA

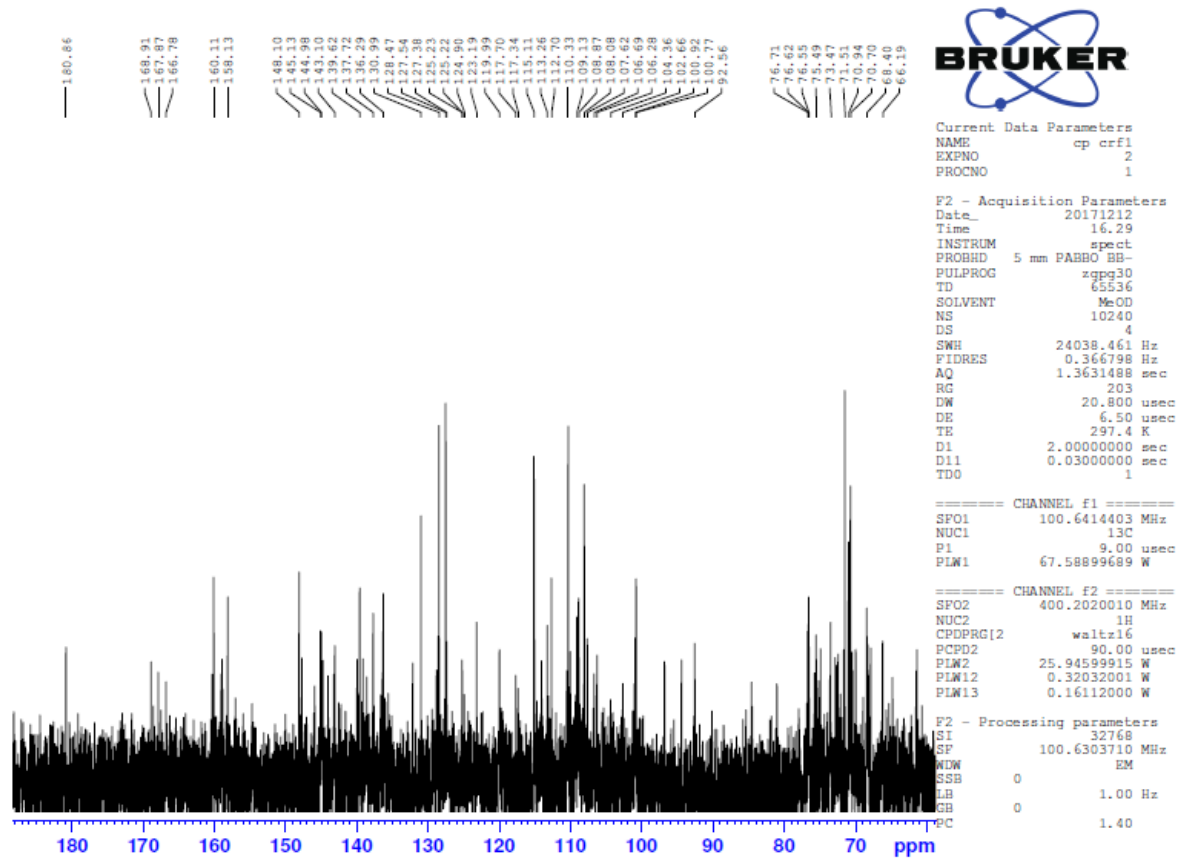

Supplementary Figure 4: <sup>13</sup>C spectrum of RFPA
